# Supplementary material
Source: PubMed Central journal article supplement (PMC2678423)
Supplement: 0901438106_0901438106SI.pdf [file 0901438106_0901438106SI.pdf]

# Supporting Information

Adams et al. 10.1073/pnas.0901438106

Table S1. Metadata for climate stations used to estimate the frequency of historical regional drought duration

| Station        | Period of record | Latitude | Longitude | Elevation, m |
|----------------|------------------|----------|-----------|--------------|
| Blanding, UT   | 1905–2008        | 37°37'N  | 109°28'W  | 1,841        |
| Bloomfield, NM | 1905–2008        | 36°40'N  | 107°58'W  | 1,768        |
| Jerome, AZ     | 1905–2008        | 34°45'N  | 112°07'W  | 1,601        |
| Mesa Verde, CO | 1922–2008        | 37°12'N  | 108°30'W  | 2,125        |
